# Supplementary material
Source: publisher figshare collection journal article supplement (https://frontiersin.figshare.com/ndownloader/files/17000471)
Supplement: Supplementary file [file 17000471]

Table S1. Number of PD patients per country or birth and median HIHD

| Regions/Countries            | N   | HIHD<br>(median) |
|------------------------------|-----|------------------|
| Anglosphere                  | 248 |                  |
| Canada                       | 220 | 0.502            |
| UK/Ireland                   | 22  | 0.460            |
| USA                          | 6   | 0.532            |
| Africa                       | 12  |                  |
| Egypt                        | 4   | 0.125            |
| Nigeria                      | 1   | 0.094            |
| South Africa                 | 4   | 0.212            |
| Tanzania (includes Zanzibar) | 1   | 0.105            |
| Uganda                       | 2   | 0.119            |
| Americas/Caribbean           | 24  |                  |
| Brazil                       | 1   | 0.208            |
| Chile                        | 2   | 0.301            |
| Colombia                     | 3   | 0.244            |
| Ecuador                      | 2   | 0.193            |
| El Salvador                  | 2   | 0.161            |
| Guyana                       | 6   | 0.284            |
| Jamaica                      | 2   | 0.255            |
| Peru                         | 2   | 0.219            |
| Trinidad                     | 3   | 0.344            |
| Venezuela                    | 1   | 0.231            |
| Central, South & West Asia   | 59  |                  |
| Afghanistan                  | 2   | 0.080            |
| Bangladesh                   | 2   | 0.100            |
| India                        | 24  | 0.117            |
| Iran                         | 9   | 0.148            |
| Iraq                         | 2   | 0.137            |
| Lebanon                      | 1   | 0.247            |
| Pakistan                     | 11  | 0.111            |
| Sri Lanka                    | 7   | 0.286            |
| Syria                        | 1   | 0.190            |
| East & Southeast Asia        | 32  |                  |
| Burma (currently Myanmar)    | 2   | 0.097            |
| China                        | 9   | 0.150            |
| Hong Kong                    | 10  | 0.271            |
| Philippines                  | 5   | 0.289            |
| Singapore                    | 1   | 0.303            |
| Vietnam                      | 5   | 0.154            |

Table S1 (cont'd). Number of PD patients per country or birth and median HIHD

|                                                                     |    |       |
|---------------------------------------------------------------------|----|-------|
| Europe                                                              | 40 |       |
| Albania                                                             | 1  | 0.301 |
| Czechoslovakia (currently Czech Republic and Slovakia)              | 1  | 0.387 |
| Denmark                                                             | 1  | 0.443 |
| France                                                              | 1  | 0.407 |
| Germany                                                             | 5  | 0.428 |
| Greece                                                              | 2  | 0.260 |
| Italy                                                               | 8  | 0.346 |
| Netherlands                                                         | 1  | 0.476 |
| Norway                                                              | 1  | 0.502 |
| Poland                                                              | 3  | 0.338 |
| Portugal                                                            | 6  | 0.287 |
| Romania                                                             | 1  | 0.260 |
| Serbia (includes Macedonia and Yugoslavia)                          | 3  | 0.264 |
| Spain                                                               | 1  | 0.244 |
| USSR (includes Belarus, Kazakhstan, Lithuania, Russia, and Ukraine) | 5  | 0.384 |

### **Supplementary Analyses – Effects of demographic and motor scores on performance biased tasks between groups**

Although most demographic and disease-related variables were similar between groups, two variables differed (i.e., older age in the Anglosphere group and higher UPDRS part 3 OFF scores in the International group). Here, we provide supplementary analyses investigating whether age and UPDRS part 3 OFF, as well as other variables known to contribute to performance on cognitive testing irrespective of culture (sex, education) have differential relationships with cognition across groups. For each task identified as culturally biased, we conducted Spearman correlations between performance and continuous variables (age, education, UPDRS part 3 OFF) for each group (Table S2), and a two-way ANOVA (group x sex; Table S3) to test for an interaction. Results do not suggest the presence of differential effects of these variables on performance on biased tests between groups.

Table S2. Spearman correlations between performance on biased tests and age, education and UPDRS part 3 OFF as a function of group (Anglosphere vs. International)

|                  | Education   |                  | Age         |               | UPDRS part 3 OFF |               |
|------------------|-------------|------------------|-------------|---------------|------------------|---------------|
|                  | Anglosphere | International    | Anglosphere | International | Anglosphere      | International |
| JLO              | .26         | .25              | -.13        | -.15          | -.23             | -.13          |
| Silhouettes      | -.01        | .04              | -.19        | -.16          | -.04             | -.02          |
| Object Decision  | -.09        | .03              | -.08        | -.08          | -.04             | -.12          |
| Matrix Reasoning | .34         | .50 <sup>b</sup> | -.18        | -.30          | -.23             | -.16          |
| Category Fluency | .24         | .20              | -.22        | -.23          | -.17             | -.13          |
| WCST errors      | -.30        | -.35             | .24         | .21           | .13              | .10           |

Note. a: JLO = Benton Judgement of Line Orientation, WCST = Wisconsin Card Sorting Test

b: The greatest difference is seen on the Matrix Reasoning subtest and education correlations (.16 difference), but the magnitude of the correlations does not differ significantly between groups ( $z = 1.88$   $p = .06$ ).

Table S3. Two-way ANOVA between performance on biased tests and group x sex

|                  | Main effect Group             | Main Effect Sex                 | Interaction (group x sex)   |
|------------------|-------------------------------|---------------------------------|-----------------------------|
| JLO              | $F(1, 410) = 30.68, p < .001$ | $F(1, 410) = 18.91, p < .001^b$ | $F(1, 410) = 2.98, p = .09$ |
| Silhouettes      | $F(1, 378) = 50.87, p < .001$ | $F(1, 378) = 4.91, p = .03$     | $F(1, 378) = 0.07, p = .79$ |
| Object Decision  | $F(1, 411) = 74.16, p < .001$ | $F(1, 411) = 2.72, p = .10$     | $F(1, 411) = 1.65, p = .20$ |
| Matrix Reasoning | $F(1, 408) = 25.94, p < .001$ | $F(1, 408) = 0.08, p = .78$     | $F(1, 408) = 0.73, p = .39$ |
| Category Fluency | $F(1, 409) = 61.54, p < .001$ | $F(1, 409) = 10.92, p = .001^b$ | $F(1, 409) = 0.07, p = .77$ |
| WCSTerrors       | $F(1, 407) = 7.21, p = .008$  | $F(1, 407) = 3.80, p = .05$     | $F(1, 407) = 3.47, p = .06$ |

Note. a: JLO = Benton Judgement of Line Orientation, WCST = Wisconsin Card Sorting Test

b. Men obtained higher scores on JLO than Women, but lower scores on Category Fluency
